1       **Fatty acids produced by the gut microbiota dampen host inflammatory**  
2                   **responses by modulating intestinal SUMOylation**

3

4                   Chaima Ezzine<sup>1,2</sup>, Léa Loison<sup>1,2</sup>, Christine Bole-Feysot<sup>1,2</sup>,

5                   Pierre Déchelotte<sup>1,2,3</sup>, Moïse Coëffier<sup>1,2,3</sup>, David Ribet<sup>1,2,\*</sup>

6

7       1. Normandie Univ, UNIROUEN, INSERM UMR 1073, Nutrition, Inflammation et axe  
8       Microbiote-Intestin-Cerveau, Rouen, France.

9       2. Normandie Univ, UNIROUEN, Institute for Research and Innovation in Biomedicine  
10       (IRIB), Rouen, France.

11       3. CHU Rouen, Nutrition Department, Rouen, France.

12

13       \* Corresponding author: david.ribet@inserm.fr

14       INSERM UMR1073 – Université de Rouen

15       UFR Santé - 22 Boulevard Gambetta

16       76183 ROUEN CEDEX

17       Tel : 33 (0) 2 35 14 82 40

18 **Abstract**

19

20 The gut microbiota produces a wide variety of metabolites, which interact with intestinal cells  
21 and contribute to host physiology. These metabolites regulate intestinal cell activities by  
22 modulating either gene transcription or post-translational modifications of gut proteins. The  
23 effect of gut commensal bacteria on SUMOylation, an essential ubiquitin-like modification in  
24 intestinal physiology, remains however unknown. Here, we show that short chain fatty acids  
25 (SCFAs) and branched chain fatty acids (BCFAs) produced by the gut microbiota increase  
26 protein SUMOylation in different intestinal cell lines in a pH-dependent manner. We  
27 demonstrate that these metabolites induce an oxidative stress which inactivates intestinal  
28 deSUMOylases and promotes the hyperSUMOylation of chromatin-bound proteins. In order  
29 to determine the impact of these modifications on intestinal physiology, we focused on the  
30 NF- $\kappa$ B signaling pathway, a key player in inflammation known to be regulated by  
31 SUMOylation. We demonstrated that the hyperSUMOylation induced by SCFAs/BCFAs  
32 inhibits the activation of the NF- $\kappa$ B pathway in intestinal cells by blocking the degradation of  
33 the inhibitory factor I $\kappa$ B $\alpha$  in response to TNF $\alpha$ . This results in a decrease in pro-  
34 inflammatory cytokines expression, such as IL8 or CCL20, as well as a decrease in intestinal  
35 epithelial permeability in response to TNF $\alpha$ . Together, our results reveal that fatty acids  
36 produced by gut commensal bacteria regulate intestinal physiology by modulating  
37 SUMOylation and illustrate a new mechanism of dampening of host inflammatory responses  
38 by the gut microbiota.

39 **Keywords**

40 Gut microbiota, Short Chain Fatty Acids (SCFAs), Branched Chain Fatty Acids (BCFAs),  
41 SUMOylation, intestinal inflammation, post-translational modifications, host-bacteria  
42 interactions.

43

44 **Introduction**

45 The gut microbiota produces a wide variety of metabolites diffusing to the intestinal mucosa  
46 and modulating intestinal cell activities<sup>1</sup>. Some of these metabolites may even cross the  
47 intestinal barrier and reach distant organs via the bloodstream or via nerve communications.

48 Fatty acids constitute a major class of metabolites produced by intestinal bacteria. They  
49 include the so-called Short Chain Fatty Acids (SCFAs), which are carboxylic acids with  
50 aliphatic tails of 1 to 6 carbons<sup>2</sup>. Acetate, butyrate and propionate are the main SCFAs  
51 produced in the human colon and derive from the anaerobic catabolism of dietary fibers and  
52 proteins by intestinal bacteria<sup>3,4</sup>. Branched Chain Fatty Acids (BCFAs), such as isobutyrate,  
53 isovalerate or 2-methylbutyrate, constitute another class of fatty acids produced by bacteria  
54 with one or more methyl branches on the carbon chain. BCFA mostly derive from the  
55 breakdown of proteins by intestinal bacteria, and more particularly from the catabolism of  
56 branched-chain amino-acids (valine, leucine and isoleucine, producing isobutyrate,  
57 isovalerate or 2-methylbutyrate, respectively)<sup>5</sup>.

58 Fatty acids regulate intestinal cell activities by various mechanisms. They may bind to  
59 specific receptors expressed on intestinal cells, such as GPR41/FFAR3, GPR43/FFAR2 and  
60 GPR109A, and activate various signaling pathways<sup>6</sup>. Fatty acids may also directly enter into  
61 intestinal cells by passive diffusion or by facilitated transport. Once in intestinal cells, they  
62 participate to the cell metabolism. For example, colonocytes were shown to use butyrate as a  
63 major energy source or, alternatively, isobutyrate when butyrate availability is low<sup>7,8</sup>. Finally,

64 fatty acids may regulate intestinal cell activities by interfering with post-translational  
65 modification such as neddylation<sup>9,10</sup>. The impact of fatty acids on other ubiquitin-like  
66 modifications in intestinal cells has not been described yet.

67 SUMOylation is an ubiquitin-like modifications consisting in the covalent addition of SUMO  
68 (Small Ubiquitin-like MOdifier) peptides to target proteins. Five SUMO paralogs have been  
69 identified in humans that share 45-97% sequence identity. SUMO1, SUMO2 and SUMO3,  
70 which are the most studied paralogs, can be conjugated to both overlapping and distinct sets  
71 of proteins<sup>11</sup>. The conjugation of SUMO to lysine residues of target proteins is catalysed by  
72 an enzymatic machinery composed of one E1 enzyme (SAE1/SAE2), one E2 enzyme (UBC9)  
73 and several E3 enzymes<sup>12</sup>. SUMOylation is a reversible modification as the isopeptide bond  
74 between SUMO and its target can be cleaved by specific proteases called deSUMOylases<sup>13</sup>.  
75 The consequences of SUMO conjugation on target proteins are very diverse and include  
76 changes in protein localization, stability, activity or interactions with other cellular  
77 components<sup>11,14,15</sup>.

78 SUMOylation plays essential roles in intestinal physiology as it limits detrimental  
79 inflammation while participating to tissue integrity maintenance<sup>16,17</sup>. Interestingly, several  
80 intestinal bacterial pathogens were shown to interfere with epithelial cell SUMOylation<sup>18</sup>.  
81 *Listeria monocytogenes*, for example, secretes a pore-forming toxin triggering the degradation  
82 of the host cell E2 SUMO enzyme and the rapid loss of SUMO-conjugated proteins<sup>19,20</sup>.  
83 *Salmonella enterica* serovar Typhimurium also targets the host E2 SUMO enzymes during  
84 infection by inhibiting its translation via miRNA-based mechanisms<sup>21</sup>. *Shigella flexneri*,  
85 finally, similarly switches off the SUMOylation machinery by triggering a calpain-dependent  
86 cleavage of the SUMO E1 enzyme SAE2 in infected cells<sup>22</sup>. In contrast to these examples of  
87 pathogens dampening intestinal cell SUMOylation, the impact of gut commensal bacteria on  
88 the SUMOylation of intestinal proteins remains unknown. We investigate here whether

89 bacterial metabolites derived from the gut microbiota regulate intestinal cell activities by  
90 modulating host protein SUMOylation. We demonstrate that bacterial fatty acids induce an  
91 hyperSUMOylation in intestinal cells, which dampens inflammatory responses and promotes  
92 intestinal epithelial integrity.

93

## 94 **Material and Methods**

### 95 *Animals*

96 Animal care and experimentation were approved by a regional Animal Experimentation  
97 Ethics Committee (APAFIS#21102–2019061810387832 v2) and complied with the  
98 guidelines of the European Commission for the handling of laboratory animals (Directive  
99 2010/63/EU). All efforts were made to minimize suffering of animals.

100 Eight-weeks-old C57Bl/6JRj male mice (Janvier Labs, Le-Genest-Saint-Isle, France) were  
101 housed at 23°C (5 animals/cage) with a 12-h light-dark cycle in regular open cages. All  
102 animals were fed with a non-sterilized standard rodent diet (3430.PM.S10, Serlab, France).  
103 Drinking water was not sterilized. After 1 week of acclimatization to the animal facility,  
104 animals were split in two groups (5-10 animals/group): one group received antibiotics by oral  
105 gavage once a day, while the other group had no antibiotic treatment and were gavaged once a  
106 day with drinking water. For oral gavages, mice received a volume of 10 µL/g body weight of  
107 drinking water supplemented with 0.1 mg/mL Amphotericin-B (Simag-Aldrich), 10 mg/mL  
108 Ampicillin (Sigma-Aldrich), 10 mg/mL Neomycin trisulfate salt hydrate (Simag-Aldrich), 10  
109 mg/mL Metronidazole (Simag-Aldrich) and 5 mg/mL Vancomycin hydrochloride (Simag-  
110 Aldrich)<sup>23</sup>. This solution was delivered with a stainless steel tube without prior sedation of the  
111 mice. To prevent fungal overgrowth in the antibiotic-treated animals, mice were pre-treated  
112 with Amphotericin-B for 3 days before the beginning of the protocol<sup>23</sup>. As for antibiotic  
113 treatment, Amphotericin-B was delivered by oral gavage (10 µL/g body weight of drinking

114 water supplemented with 0.1 mg/mL Amphotericin-B)<sup>23</sup>. Three independent animal series  
115 were performed. At the end of the study, all animals were euthanized by an intraperitoneal  
116 injection of an overdose of ketamine (200 mg/kg BW) and xylazine (20 mg/kg BW). Jejunal  
117 and caecal segments, as well as cecal content were then removed, frozen in liquid nitrogen  
118 and stored at -80°C. Two independent animal series were performed.

119

#### 120 *Quantification of caecal microorganisms by quantitative PCR*

121 Quantitative real-time polymerase chain reaction (qPCR) was performed on DNA samples  
122 extracted from mice cecal contents to monitor the efficiency of bacterial depletion in mice  
123 treated with antibiotics, as described in ref. 23. To quantify total Eubacteria, qPCR were  
124 performed using primers targeting the bacterial 16S rRNA gene (Eub-338F, 5'-  
125 ACTCCTACGGGAGGCAGCAG-3' and Eub-518R, 5'-ATTACCGCGGCTGCTGG-3')<sup>24</sup>.  
126 The C<sub>q</sub> determined in each sample were compared with a standard curve made by diluting  
127 genomic DNA extracted from a pure culture of *E. coli*, for which cell counts were determined  
128 prior to DNA isolation.

129

#### 130 *Protein extraction from mouse intestinal tissues*

131 Intestinal tissues were mechanically lysed using bead beating in a buffer containing 50 mM  
132 HEPES pH 8.0, 8 M urea buffer, supplemented with 10 mM N-ethyl-maleimide (NEM).  
133 Tissue lysates were then centrifugated for 15 min at 13,000xg at 4°C. Supernatants were  
134 collected, mixed with one volume of Laemmli buffer (125 mM Tris-HCl [pH 6.8], 4% SDS,  
135 20% glycerol, 100 mM dithiothreitol [DTT], 0.02% bromphenol blue) and analyzed by  
136 immunoblotting.

137

138

139

140 *Cell culture*

141 CACO2 (American Type Culture Collection (ATCC)-HTB-37), HeLa (ATCC-CCL2) and  
142 T84 (ATCC CCL- 248) cells were cultivated at 37°C in a 5% CO<sub>2</sub> atmosphere. CACO2 and  
143 HeLa cells were cultivated in Minimum Essential Medium (MEM) (Eurobio) supplemented  
144 with 2 mM L-Glutamine (Invitrogen), 10% Fetal Bovine Serum (FBS, Eurobio), non-essential  
145 aminoacids (Sigma-Aldrich), 1 mM sodium pyruvate (Gibco) and a mixture of penicillin  
146 (10000U/mL) and streptomycin (10mg/mL). T84 cells were cultivated in DMEM/F12  
147 (Dulbecco's Modified Eagle Medium F-12) (Eurobio) supplemented with 10% FBS and 2.5  
148 mM L-Glutamine.

149 CACO2 and T84 cells were seeded in wells at a density of  $1.1 \times 10^5$  cells/cm<sup>2</sup> and  $1.7 \times 10^5$   
150 cells/cm<sup>2</sup>, respectively, the day before treatments with BCFA or SCFA.

151 Before treatments, cell culture medium was replaced by HBSS (Hanks' Balanced Salt  
152 Solution; Sigma-Aldrich). Cells were then treated as indicated in the text. For BCFAs and  
153 SCFAs treatments, 100 mM stock solutions in water were first prepared from the  
154 corresponding acidic form (*e.g.* isobutyric acid) or from the sodium salt of the corresponding  
155 basic form (*e.g.* sodium isobutyrate) and then further diluted in cell culture media (HBSS).

156 When needed, the pH of cell culture medium was shifted using either 0.1 M NaOH or 0.1 M  
157 HCl solution. For treatments with ROS inhibitors, CACO2 cells were pre-incubated for 30  
158 min with 5 mM N-acetyl-cysteine (NAC) or 10 μM Diphenyleneiodonium (DPI) and then  
159 incubated for 1 h with 5 mM isobutyric acid or isovaleric acid. For immunoblotting  
160 experiments, cells were lysed directly in Laemmli buffer. For TNFα treatments, CACO2 cells  
161 were first incubated with BCFAs or SCFAs for 1 hour and then incubated with 100 ng/mL  
162 TNFα. For immunoblotting and qRT-PCR analyses, cells were lysed after 30 min or 1h of

163 incubation with TNF $\alpha$ , respectively. For Transepithelial electrical resistance (TEER)  
164 measurements, cells were incubated for 24h with TNF $\alpha$ .

165

#### 166 *Immunoblot analyses*

167 Cell lysates and protein extracts from intestinal tissues in Laemmli buffer were boiled for 5  
168 min, sonicated and protein content was analysed by electrophoresis on TGX Stain-free pre-  
169 cast SDS-polyacrylamide gel (Bio-rad). Proteins were then transferred on PVDF membranes  
170 (GE Healthcare) and detected after incubation with specific antibodies using ECL Clarity  
171 Western blotting Substrate (Bio-Rad). Primary and secondary antibodies used for immunoblot  
172 analyses are described in Supplementary Table S1. All displayed immunoblots are  
173 representative of at least two independent experiments. Quantifications of proteins from  
174 intestinal tissues were performed on a ChemiDoc Imaging System (Bio-rad). SUMO2/3-  
175 conjugated proteins levels (above 50 kDa) were normalized by the level of total proteins in  
176 each lysate (determined using the TGX-stain free imaging technology; Bio-rad).

177

#### 178 *Detection of Reactive Oxygen Species*

179 Detection of ROS was adapted from ref. 25. Luminol was dissolved in NaOH 0.1 M to obtain  
180 a 50 mM stock solution. A stock solution of 1000 U/mL HRP (HorseRadish Peroxidase) was  
181 prepared in parallel in PBS (Phosphate-Buffered Saline). Culture media from CACO2 and  
182 HeLa cells treated with BCFAs or SCFAs were collected and centrifugated for 5 min at  
183 13,000xg at room temperature to eliminate cell remnants. The pH of the obtained supernatants  
184 was then buffered to 7.5 to avoid pH-dependent interferences with luminol activity. Luminol  
185 (1 mM final concentration) and HRP (4 U/mL) were finally added to each culture media and  
186 luminescence was quantified immediately on a luminometer (Tecan).

187



188 *DeSUMOylase activity*

189 DeSUMOylase activity assays were adapted from ref. 26. CACO2 and T84 cells grown in 12-  
190 well plates were scraped in 100  $\mu$ L lysis buffer (Tris HCl pH 8.0 50 mM, EDTA 5 mM, NaCl  
191 200 mM, Glycerol 10%, NP40 0.5%). Negative controls were prepared by adding 10 mM N-  
192 ethymaleimide (NEM; Sigma-Aldrich) to cell lysates. Recombinant human SUMO1-AMC  
193 and SUMO2-AMC proteins (R&D Systems) were diluted in parallel to 500 nM in Assay  
194 buffer (Tris HCl pH 8.0 50 mM, Bovine Serum Albumin (BSA) 100  $\mu$ g/mL, Dithiothreitol  
195 (DTT) 10 mM). For each measurement, 10  $\mu$ L of cell lysate were mixed with 40  $\mu$ L of  
196 SUMO-AMC containing Assay buffer and fluorescence ( $\lambda_{\text{Ex}}=380$  nm;  $\lambda_{\text{Em}}=460$  nm) was  
197 recorded for 30 min at 37°C on a Flexstation 3 microplate reader (Molecular Devices).  
198 Measurements were performed in duplicate. DeSUMOylase activities were determined by  
199 calculating the initial speed of fluorescence emission in each lysate, normalized by the  
200 quantity of proteins in the corresponding sample, determined in parallel using BCA assays  
201 (Pierce<sup>TM</sup> BCA Protein Assay Kit).

202

203 *Cell fractionation*

204 CACO2 cells incubated or not with 5 mM isobutyric, isovaleric or butyric acids for 5 h were  
205 washed once at room temperature in PBS, collected by scraping in ice-cold PBS, and then  
206 centrifugated at 130xg at 4°C for 3 min. Cell pellets were then lysed in 5 volumes of ice-cold  
207 E1 buffer (50 mM HEPES-KOH pH 7.5; 140 mM NaCl; 1mM EDTA; 10% glycerol; 0.5%  
208 NP-40; 0.25% Triton X-100; 1 mM DTT; protease inhibitors [complete protease inhibitor  
209 cocktail tablets; Roche]) and centrifugated at 1,100xg at 4°C for 2 min. The supernatants  
210 (corresponding to cytosolic fractions) were then collected. Pellets were washed by adding 5  
211 volumes of E1 buffer and centrifugated at 1,100xg at 4°C for 2 min. Pellets were additionally  
212 washed by adding 5 volumes of E1 buffer, incubated 10 min on ice and centrifugated at

213 1,100xg at 4°C for 2 min. Pellets were then resuspended in 2 volumes of ice-cold E2 buffer  
214 (10 mM Tris-HCl pH 8.0; 200 mM NaCl; 1 mM EDTA; 0.5 mM EGTA; protease inhibitors).  
215 These suspensions were centrifugated at 1,100xg at 4°C for 2min and supernatants  
216 (corresponding to nuclear soluble fractions) were collected. Pellets were washed by adding 2  
217 volumes of E2 buffer and centrifugated at 1,100xg at 4°C for 2 min. Pellets were additionally  
218 washed by adding 2 volumes of E2 buffer, incubated 10 min on ice and centrifugated at  
219 1,100xg at 4°C for 2 min. Pellets were then resuspended in 5 volumes of ice-cold E3 buffer  
220 (500 mM Tris-HCl pH 6.8; 500 mM NaCl; protease inhibitors). These suspensions were  
221 centrifugated at 16,000xg at 4°C for 10 min. Pellets (corresponding to insoluble chromatin-  
222 bound fractions) were finally resuspended directly in Laemmli buffer. Cytosolic and nuclear  
223 soluble fractions were mixed 1:1 with Laemmli buffer. All fractions were boiled for 5 min  
224 and sonicated before immunoblotting analyses.

225

#### 226 *Quantification of proinflammatory cytokines expression*

227 Total RNAs were extracted from CACO2 cells using RNeasy Plus Mini kit (Qiagen)  
228 following manufacturer's instructions. For each condition, 1 µg of total RNAs was reverse  
229 transcribed using random hexamers and M-MLV reverse transcriptase (Invitrogen). Specific  
230 cDNAs were then quantified by qPCR using Itaq Universal SYBR Green Supermix (Bio-  
231 Rad). GAPDH was used as an internal reference for normalization. Primers used in this study  
232 are hGAPDH\_F (5'-TGCCATCAATGACCCCTTCA-3'), hGAPDH\_R (5'-  
233 TGACCTTGCCACAGCCTTG-3'), hIL8\_F (5'-TGGCAGCCTTCCTGATTT-3'), hIL8\_R  
234 (5'-AACTTCTCCACAACCCTCTG-3'), hCCL20\_F (5'-TTTGCTCCTGGCTGCTTTGA-  
235 3') and hCCL20\_R (5'-GCAAGTGAAACCTCCAACCC-3'). Serial dilution of target  
236 cDNAs were included on each plate to generate a relative curve and to integrate primer  
237 efficiency in the calculations of mRNA quantities.

238

239

240

241 *Evaluation of intestinal epithelial permeability*

242 CACO2 cells were seeded in Transwell inserts and cultivated for 21 days. Monolayer  
243 formation and differentiation was monitored by daily evaluation of transepithelial electrical  
244 resistance (TEER) measurement, performed with an EVOM epithelial volttohmmeter  
245 equipped with “chopstick” electrodes. After three weeks, cell culture media were replaced by  
246 HBSS. Cells were preincubated or not with isobutyric or isovaleric acids for 1 hour. 100  
247 ng/mL TNF $\alpha$  was then added to both apical and basolateral compartments. TEER was  
248 evaluated after 24h of incubation.

249

250 **Results**

251 **Gut microbiota depletion decreases protein SUMOylation in the caecum.**

252 To determine whether the gut microbiota affects intestinal SUMOylation, we compared the  
253 global SUMOylation patterns of intestinal segments from conventional mice or from mice  
254 with a depleted gut microbiota. Depletion of mice intestinal bacteria was performed via the  
255 oral gavage of a cocktail of antibiotics during 7 days<sup>23</sup>. We quantified by qPCR the total  
256 amount of Eubacteria in the cecal content of mice treated with antibiotics to ensure that the  
257 efficiency of bacterial depletion was above 75%. The SUMOylation pattern of jejunal and  
258 caecal segments were then analyzed by immunoblotting experiments using anti-SUMO2/3  
259 antibodies (Fig. 1). The level of SUMO2/3-conjugated proteins (above 50 kDa) was  
260 quantified in each sample. Interestingly, we observed that mice with a depleted gut microbiota  
261 exhibit a significant decrease in the level of SUMO2/3-conjugated proteins in the caecum  
262 (Fig. 1). In contrast, we did not observe any significant modification of the SUMOylation

263 profile in the jejunum of mice treated with antibiotics (Fig. 1). Together, these results suggest  
264 that the gut microbiota regulates the level of protein SUMOylation in specific intestinal  
265 segments.

266

### 267 **BCFAs trigger an hyperSUMOylation of intestinal proteins.**

268 As fatty acids such as SCFAs and BCFAs are important mediators of the interactions between  
269 gut bacteria and host cells, we assessed if these metabolites may modulate intestinal cell  
270 SUMOylation. We first monitored the effect of BCFAs on intestinal cell SUMOylation *in*  
271 *vitro* by incubating CACO2 cells for 1h or 5h with isobutyric, isovaleric or 2-methyl-butyric  
272 acids (1 mM or 5 mM final concentrations) (Fig. 2 and S1). Interestingly, we observed that all  
273 BCFAs induced an increase in the level of proteins conjugated to SUMO2/3 after 1h or 5h of  
274 incubation (at 5 mM concentration). We observed similar results in another intestinal cell line,  
275 T84 cells, after incubation with isobutyric, isovaleric acids or 2-methyl-butyric acids (Fig. 2  
276 and S1).

277

### 278 **The effect of BCFAs on intestinal SUMOylation is pH dependent.**

279 BCFAs are weak organic acids, which exist in solution either as acidic (R-COOH) or basic  
280 (R-COO<sup>-</sup>) forms. For example, addition of 5 mM isovaleric acid in HBSS medium leads to a  
281 solution with a pH of ~5.2 containing approximately 30% (*i.e.* ~1.4 mM ) of the acidic form  
282 (isovaleric acid) and 70% (*i.e.* ~3.6 mM) of the basic form (isovalerate). In contrast, addition  
283 of 5 mM sodium isovalerate in HBSS medium leads to a solution with a pH of ~7.5  
284 containing approximately 0.2% (*i.e.* ~0.01 mM) of isovaleric acid and 99.8% (*i.e.* ~4.99  
285 mM) of isovalerate. To decipher whether both acidic and basic forms of BCFAs trigger  
286 hyperSUMOylation in intestinal cells, we added 5 mM isovaleric acid to CACO2 cells  
287 supernatant and increased gradually the cell culture medium pH from 5.2 to 7.0 (thereby

288 decreasing the isovaleric acid/isovalerate ratio) (Fig. 3A). We did not observe any  
289 hyperSUMOylation when cells were incubated at pH 6.0 or 7.0, in contrast to cells incubated  
290 at pH 5.2. This shows that only isovaleric acid (and not isovalerate) promotes SUMO-  
291 conjugation of intestinal proteins.

292 We then added increasing amounts of isovaleric acid to CACO2 cell culture medium and set  
293 in parallel the pH between 5.2 and 7.0. For each pH, the amount of isovaleric acid added to  
294 cells was calculated to maintain a final concentration of isovaleric acid in the cell culture  
295 medium to ~1.4 mM. We observed that this increase in BCFA concentration restores the  
296 hyperSUMOylation observed in CACO2 cells at pH 6 and 7 (Fig. 3A). This result  
297 demonstrates that BCFAs, when present in high concentration, trigger hyperSUMOylation  
298 even at neutral or weakly acidic pH.

299 Of note, the acidic forms of fatty acids are uncharged and freely diffusible across cellular  
300 membranes, in contrast to the basic forms, which are negatively charged and only cross  
301 membranes thanks to specific transporters. Thus, as only the acidic forms of BCFA induce an  
302 hyperSUMOylation of intestinal proteins, we can hypothesize that these forms diffuse  
303 passively across the cell membrane, and then act intracellularly on intestinal cell  
304 SUMOylation.

305

### 306 **SCFAs also affect intestinal SUMOylation.**

307 To complete our results obtained with BCFAs, we determined whether SCFAs similarly  
308 impact intestinal cell SUMOylation. We incubated CACO2 cells with acetic, butyric and  
309 propionic acid for 5h (5 mM final concentration; pH~5.2). Interestingly, we observed that  
310 SCFAs induce an increase in the level of SUMO2/3-conjugated proteins. In contrast,  
311 incubation of cells with sodium acetate, butyrate or propionate (5 mM final concentration;  
312 pH~7.5) does not trigger any change in the SUMOylation pattern of CACO2 cells. Together,

313 these results indicate that SCFAs, as BCFAs, modulate intestinal protein SUMOylation in a  
314 pH-dependent manner (Fig. 3C).

315

316

317

### 318 **BCFAs-induced hyperSUMOylation is dependent of ROS production**

319 Butyric acid was previously reported to induce ROS (Reactive Oxygen Species) production in  
320 both IEC-6 intestinal epithelial cells and HeLa cells<sup>10</sup>. We thus tested whether SCFAs and  
321 BCFAs similarly induce ROS production in CACO2 and HeLa cells. For this, we used a  
322 sensitive luminol-based ROS detection assay<sup>25</sup>. We observed that the addition of isobutyric,  
323 isovaleric or butyric acid induce ROS production in both CACO2 and HeLa cells after 1h of  
324 incubation (Fig. 4A). This oxidative stress is transient as the level of ROS decreased between  
325 1 and 5h of incubation (Fig. 4A). Interestingly, the oxidative stress induced by BCFAs and  
326 SCFAs is pH-dependent as no ROS were detected after incubation with sodium isobutyrate,  
327 isovalerate or butyrate (Fig. 4A). This suggests that ROS are produced only in response to the  
328 diffusion of the acidic form of BCFAs and SCFAs inside CACO2 cells.

329 To determine whether ROS production was responsible for the hyperSUMOylation triggered  
330 by fatty acids, we pre-incubated CACO2 cells with two ROS scavengers, N-acetyl cysteine  
331 (NAC) and Diphenyleneiodonium (DPI). These cells were then incubated with isobutyric or  
332 isovaleric acids for 5h. We observed that preincubation with oxidative stress inhibitors blocks  
333 BCFAs-induced hyperSUMOylation (Fig. 4B). Together, these results demonstrate that the  
334 acidic forms of SCFAs and BCFAs trigger the production of ROS in intestinal cells, which in  
335 turn promotes SUMO-conjugation of intestinal proteins.

336

### 337 **BCFAs inhibit intestinal cell deSUMOylases**

338 Global increase in SUMOylation may result either from an increase in the SUMOylation  
339 machinery's activity or from an inhibition of cellular deSUMOylases. As deSUMOylases  
340 were reported to be sensitive to oxidative stress<sup>27,28</sup>, we evaluated whether BCFAs could  
341 inhibit SUMO-deconjugation in intestinal cells. For this, CACO2 and T84 cells were  
342 incubated with isobutyric or isovaleric acids and lysed. Cell lysates were then mixed with  
343 SUMO1 or SUMO2 peptides covalently linked to AMC (7-amido-4-methylcoumarin). The  
344 activity of deSUMOylases was then quantified in these cell lysates by measuring the  
345 fluorescence intensity of AMC released by the deSUMOylase-dependent cleavage of the  
346 amide bond between AMC and SUMO (Fig. 5)<sup>26</sup>. We demonstrated that incubation with 5  
347 mM isobutyric or isovaleric acids for 5 h significantly decreases SUMO deconjugation  
348 reactions in cell lysates, both for SUMO1- and SUMO2-conjugated substrates (Fig. 5). These  
349 results indicate that deSUMOylases are inhibited in response to BCFAs exposure.

350 Of note, we quantified in parallel the expression levels of E1 and E2 SUMO enzymes in  
351 CACO2 cells treated with BCFAs using immunoblotting experiments. We observed that  
352 isobutyric and isovaleric acids do not alter the level of SAE1/SAE2 or UBC9 (Fig. S2).

353 Together, these results suggest that the hyperSUMOylation induced by BCFAs result from the  
354 inhibition of intestinal cell deSUMOylases.

355

### 356 **BCFAs-induced ROS does not affect Cullin-1 neddylation in CACO2 cells**

357 In addition to SUMOylation, other Ubiquitin-like proteins such as NEDD8 were reported to  
358 be sensitive to oxidative stress. Previous reports established that ROS produced in response to  
359 butyric acid exposure inactivate the NEDD8-conjugating enzyme Ubc12 and trigger the loss  
360 of cullin-1 neddylation in HeLa cells<sup>9,10</sup>. We thus assessed whether BCFAs also decrease  
361 cullin-1 neddylation in CACO2 or HeLa cells. Interestingly, we observed that isobutyric and  
362 isovaleric acid triggers cullin-1 deneddylation after 5h of incubation in HeLa cells, similarly

363 to butyric acid, but not in CACO2 cells (Fig. S3). This suggests that the consequences of  
364 SCFAs/BCFAs-induced ROS are cell-type dependent and that BCFAs/SCFAs do not affect  
365 neddylation in CACO2 cells.

366

367

### 368 **BCFAs promotes SUMOylation of chromatin-bound proteins**

369 In order to decipher whether all SUMO targets are similarly affected by fatty acids-induced  
370 hyperSUMOylation, we first focused on RanGAP1, one of the main SUMO targets in human  
371 cells. We observed that the SUMOylation level of this specific target was not affected by  
372 BCFAs (Fig. S3), which suggests that only a subset of intestinal proteins are  
373 hyperSUMOylated. In order to characterize whether proteins conjugated to SUMO in  
374 response to BCFAs are located in specific cellular compartments, we performed cell  
375 fractionation assays. Very interestingly, we observed that the level of SUMO-conjugated  
376 proteins was strongly increased only in chromatin-bound fractions, thus suggesting that  
377 BCFAs promote the SUMOylation of chromatin-bound factors (Fig. 6).

378

### 379 **BCFAs and SCFAs-induced hyperSUMOylation impair NF- $\kappa$ B inflammatory responses**

380 As SUMOylation is known to regulate inflammation<sup>17,29</sup>, we determined whether  
381 BCFAs/SCFAs-induced hyperSUMOylation could modulate inflammatory responses in  
382 intestinal cells. To do so, we incubated CACO2 cells with TNF $\alpha$  in the presence or absence  
383 of BCFAs. We then quantified the expression levels of the pro-inflammatory IL8 and CCL20  
384 cytokines by qRT-PCR. We observed that both isobutyric and isovaleric acids downregulate  
385 the transcription of IL8 and CCL20 in response to TNF $\alpha$  in CACO2 cells (Fig. 7A). We then  
386 compared the respective effect of the acidic or basic forms of BCFAs and SCFAs on the  
387 expression of these cytokines. We observed that the basic form of BCFAs and SCFAs



388 partially decrease expression of IL8 and CCL20. Interestingly, we show that the acidic forms  
389 of BCFAs and SCFAs further decrease the expression of IL8 and CCL20 to the levels of cells  
390 unstimulated by TNF $\alpha$  (Fig. 7A). As acidic forms of SCFAs/BCFAs trigger  
391 hyperSUMOylation in contrast to basic forms (Fig. 3), this result show that SCFAs/BCFAs-  
392 induced hyperSUMOylation dampens pro-inflammatory cytokines expression in intestinal  
393 cells.

394 As IL8 and CCL20 expression is regulated by the NF- $\kappa$ B transcription factor, we tested  
395 whether BCFA could interfere with the NF- $\kappa$ B signaling pathway. To do so, we focused on  
396 the degradation of the I $\kappa$ B $\alpha$  inhibitor, which is a key step in the activation of NF- $\kappa$ B and a  
397 pre-requisite for NF- $\kappa$ B translocation into the nucleus. We quantified using immunoblotting  
398 experiments the level of I $\kappa$ B $\alpha$  in CACO2 cells incubated with TNF $\alpha$  in the presence or  
399 absence of BCFAs and SCFAs. We observed that isobutyric, isovaleric and butyric acids  
400 block the degradation of I $\kappa$ B $\alpha$  triggered by TNF $\alpha$  (Fig. 7B and 7C). This inhibition was not  
401 observed with sodium isobutyrate, isovalerate and butyrate, suggesting that the  
402 hyperSUMOylation induced by the acidic forms of SCFAs/BCFAs block I $\kappa$ B $\alpha$  degradation  
403 and thus dampen the NF- $\kappa$ B signaling pathway (Fig. 7B and 7C).

404

#### 405 **BCFAs-induced hyperSUMOylation promote intestinal epithelial integrity**

406 We finally determined whether BCFAs-induced hyperSUMOylation regulate intestinal  
407 permeability. To do so, CACO2 cells were grown for 3 weeks in Transwell systems in order  
408 to reconstitute an *in vitro* model of differentiated intestinal epithelium. Cells were then  
409 incubated with TNF $\alpha$  and the permeability of the obtained epithelium was monitored by  
410 measuring the transepithelial electrical resistance (TEER) between the apical and basal  
411 compartments. Treatment with TNF $\alpha$  induces a significant decrease in TEER after 24h,  
412 which corresponds to an increase in epithelial permeability, as previously described (Fig. 7D).

413 Interestingly, we show that incubation of CACO2 cells with isobutyric and isovaleric acids  
414 blocks this TNF $\alpha$ -induced increase in epithelial permeability. This result show that BCFAs  
415 promote intestinal epithelial integrity in response to inflammatory stimuli.

416

417

418

## 419 **Discussion**

420 Post-translational modifications are widely used by eukaryote cells to modulate rapidly,  
421 locally and specifically the interactions or activities of key proteins. SUMOylation plays an  
422 essential role in intestinal physiology and more particularly in epithelial integrity  
423 maintenance, by controlling cell renewal and differentiation, as well as mechanic stability of  
424 the epithelium<sup>16,17</sup>. Not surprisingly, several pathogens were shown to manipulate intestinal  
425 SUMOylation in order to interfere with the activity of key host factors involved in infection<sup>18</sup>.  
426 Most of these pathogens are decreasing SUMOylation, using independent mechanisms, which  
427 illustrates a nice example of evolutive convergence. In contrast to pathogens, the potential  
428 impact of gut commensal bacteria on SUMOylation has not been investigated. Here, we show  
429 that bacterial metabolites upregulate intestinal SUMOylation by controlling the activity of  
430 host deSUMOylases. As the SUMOylation level of a given target results from the dynamic  
431 equilibrium between conjugation and deconjugation reactions, the inactivation of  
432 deSUMOylases results in an increase in protein SUMOylation levels. Interestingly, we  
433 identified that the proteins SUMOylated in response to BCFAs/SCFAs are mainly chromatin-  
434 bound proteins. As many SUMO targets are transcription factors, we can hypothesize that  
435 BCFAs/SFAs-induced SUMOylation modifies intestinal cell gene expression<sup>14,29</sup>.  
436 Our results show that BCFAs/SCFAs, by upregulating SUMOylation, dampen inflammatory  
437 responses of intestinal cells. SCFAs, and more particularly butyrate, have already been shown

438 to have an effect on intestinal inflammation<sup>3</sup>. The potential effect of BCFAs on inflammation  
439 remains in contrast poorly documented. Interestingly, long-chain BCFAs (with more than 14  
440 carbons) were shown to decrease the expression of IL8 in response to LPS in CACO2 cells  
441 and to decrease the incidence of necrotizing enterocolitis in a neonatal rat model<sup>30,31</sup>. Whether  
442 these effects are triggered by the acidic form of these long-chain BFCA, once translocated  
443 inside intestinal cells, remain to be determined. Of note, lactic acid, which is abundantly  
444 produced by the vaginal microbiota, also elicits anti-inflammatory responses on human  
445 cervicovaginal epithelial cells<sup>32</sup>. Interestingly, only lactic acid, and not lactate, prevents pro-  
446 inflammatory cytokines expression in epithelial cells, which nicely echoes our result on the  
447 anti-inflammatory properties of the acidic forms of BCFAs/SCFAs on intestinal cells<sup>32,33</sup>. The  
448 vaginal pH being naturally acid (pH<4), lactic acid is predominant in this environment  
449 compared to lactate. In the case of BCFAs and SCFAs produced by gut microbiota, the  
450 intraluminal pH is varying depending on the intestinal segment. This pH ranges from 5.5-7.5  
451 in the caecum/right colon and then increases in the left colon and rectum to 6.1-7.5<sup>34</sup>.  
452 Eventhough the acidic forms of SCFAs/BCFAs are not predominant in these conditions, the  
453 physiological high concentrations of SCFAs/BCFAs (i.e. ~100 mM for SCFAs) may be high  
454 enough to have a concentration of protonated fatty acids sufficient to modulate intestinal  
455 SUMOylation.

456 Interestingly, SUMOylation has been involved in intestinal diseases such as Inflammatory  
457 Bowel Diseases (IBD). Indeed, patients with IBD show a downregulation of the UBC9  
458 enzyme and a decrease in SUMOylated protein levels in the colon, which correlates with  
459 disease severity<sup>35</sup>. These SUMO alterations, which can also be observed in a mouse model of  
460 colitis, were proposed to contribute to intestinal immune responses deregulation<sup>35</sup>. This  
461 hypothesis is supported by the inhibition of gut inflammation observed in response to PIAS1  
462 E3 ligase overexpression in the intestine and the associated increase in SUMOylation<sup>36</sup>. Our

463 results suggest that BCFAs/SCFAs may similarly limit inflammation in this context, by  
464 restoring SUMOylation in intestinal cells.

465

466 In conclusion, this work unveils a new mechanism used by the gut microbiota to modulate  
467 intestinal cell activities and dampen inflammation. It highlights in addition the therapeutic  
468 potential of SUMOylation targeting in the treatment of inflammatory diseases such as IBD.

469

#### 470 **Acknowledgements**

471 This work was supported by INSERM, Rouen University, the iXcore Foundation for  
472 Research, the Microbiome Foundation, Janssen Horizon, the European Union and Normandie  
473 Regional Council. Europe gets involved in Normandie with European Regional Development  
474 Fund (ERDF).

475

#### 476 **References**

- 477 1. Gasaly, N., de Vos, P. & Hermoso, M.A. Impact of Bacterial Metabolites on Gut  
478 Barrier Function and Host Immunity: A Focus on Bacterial Metabolism and Its  
479 Relevance for Intestinal Inflammation. *Front Immunol* **12**, 658354 (2021).
- 480 2. Koh, A., De Vadder, F., Kovatcheva-Datchary, P. & Backhed, F. From Dietary Fiber  
481 to Host Physiology: Short-Chain Fatty Acids as Key Bacterial Metabolites. *Cell* **165**,  
482 1332-1345 (2016).
- 483 3. Parada Venegas, D. *et al.* Short Chain Fatty Acids (SCFAs)-Mediated Gut Epithelial  
484 and Immune Regulation and Its Relevance for Inflammatory Bowel Diseases. *Front*  
485 *Immunol* **10**, 277 (2019).
- 486 4. Blaak, E.E. *et al.* Short chain fatty acids in human gut and metabolic health. *Benef*  
487 *Microbes* **11**, 411-455 (2020).

- 488 5. Blachier, F., Mariotti, F., Huneau, J.F. & Tome, D. Effects of amino acid-derived  
489 luminal metabolites on the colonic epithelium and physiopathological consequences.  
490 *Amino Acids* **33**, 547-562 (2007).
- 491 6. Kimura, I., Ichimura, A., Ohue-Kitano, R. & Igarashi, M. Free Fatty Acid Receptors  
492 in Health and Disease. *Physiol Rev* **100**, 171-210 (2020).
- 493 7. Roediger, W.E. Role of anaerobic bacteria in the metabolic welfare of the colonic  
494 mucosa in man. *Gut* **21**, 793-798 (1980).
- 495 8. Jaskiewicz, J. *et al.* Catabolism of isobutyrate by colonocytes. *Arch Biochem Biophys*  
496 **327**, 265-270 (1996).
- 497 9. Kumar, A. *et al.* Commensal bacteria modulate cullin-dependent signaling via  
498 generation of reactive oxygen species. *EMBO J* **26**, 4457-4466 (2007).
- 499 10. Kumar, A. *et al.* The bacterial fermentation product butyrate influences epithelial  
500 signaling via reactive oxygen species-mediated changes in cullin-1 neddylation. *J*  
501 *Immunol* **182**, 538-546 (2009).
- 502 11. Flotho, A. & Melchior, F. Sumoylation: a regulatory protein modification in health  
503 and disease. *Annu Rev Biochem* **82**, 357-385 (2013).
- 504 12. Cappadocia, L. & Lima, C.D. Ubiquitin-like Protein Conjugation: Structures,  
505 Chemistry, and Mechanism. *Chem Rev* **118**, 889-918 (2018).
- 506 13. Kunz, K., Piller, T. & Muller, S. SUMO-specific proteases and isopeptidases of the  
507 SENP family at a glance. *J Cell Sci* **131** (2018).
- 508 14. Zhao, X. SUMO-Mediated Regulation of Nuclear Functions and Signaling Processes.  
509 *Mol Cell* **71**, 409-418 (2018).
- 510 15. Chang, H.M. & Yeh, E.T.H. SUMO: From Bench to Bedside. *Physiol Rev* **100**, 1599-  
511 1619 (2020).

- 512 16. Demarque, M.D. *et al.* Sumoylation by Ubc9 regulates the stem cell compartment and  
513 structure and function of the intestinal epithelium in mice. *Gastroenterology* **140**, 286-  
514 296 (2011).
- 515 17. Karhausen, J., Ulloa, L. & Yang, W. SUMOylation Connects Cell Stress Responses  
516 and Inflammatory Control: Lessons From the Gut as a Model Organ. *Front Immunol*  
517 **12**, 646633 (2021).
- 518 18. Ribet, D. & Cossart, P. Ubiquitin, SUMO, and NEDD8: Key Targets of Bacterial  
519 Pathogens. *Trends Cell Biol* **28**, 926-940 (2018).
- 520 19. Ribet, D. *et al.* *Listeria monocytogenes* impairs SUMOylation for efficient infection.  
521 *Nature* **464**, 1192-1195 (2010).
- 522 20. Impens, F., Radoshevich, L., Cossart, P. & Ribet, D. Mapping of SUMO sites and  
523 analysis of SUMOylation changes induced by external stimuli. *Proc Natl Acad Sci U*  
524 *S A* **111**, 12432-12437 (2014).
- 525 21. Verma, S. *et al.* *Salmonella* Engages Host MicroRNAs To Modulate SUMOylation: a  
526 New Arsenal for Intracellular Survival. *Mol Cell Biol* **35**, 2932-2946 (2015).
- 527 22. Lapaquette, P. *et al.* *Shigella* entry unveils a calcium/calpain-dependent mechanism  
528 for inhibiting sumoylation. *Elife* **6** (2017).
- 529 23. Tirelle, P. *et al.* Comparison of different modes of antibiotic delivery on gut  
530 microbiota depletion efficiency and body composition in mouse. *BMC Microbiol* **20**,  
531 340 (2020).
- 532 24. Fierer, N., Jackson, J.A., Vilgalys, R. & Jackson, R.B. Assessment of soil microbial  
533 community structure by use of taxon-specific quantitative PCR assays. *Appl Environ*  
534 *Microbiol* **71**, 4117-4120 (2005).

- 535 25. Kim, J.S., Jeong, K., Murphy, J.M., Rodriguez, Y.A.R. & Lim, S.S. A Quantitative  
536 Method to Measure Low Levels of ROS in Nonphagocytic Cells by Using a  
537 Chemiluminescent Imaging System. *Oxid Med Cell Longev* **2019**, 1754593 (2019).
- 538 26. Kunz, K., Muller, S. & Mandler, L. Assays of SUMO protease/isopeptidase activity  
539 and function in mammalian cells and tissues. *Methods Enzymol* **618**, 389-410 (2019).
- 540 27. Stankovic-Valentin, N. & Melchior, F. Control of SUMO and Ubiquitin by ROS:  
541 Signaling and disease implications. *Mol Aspects Med* **63**, 3-17 (2018).
- 542 28. Xu, Z. *et al.* Molecular basis of the redox regulation of SUMO proteases: a protective  
543 mechanism of intermolecular disulfide linkage against irreversible sulfhydryl  
544 oxidation. *FASEB J* **22**, 127-137 (2008).
- 545 29. Boulanger, M., Chakraborty, M., Tempe, D., Piechaczyk, M. & Bossis, G. SUMO and  
546 Transcriptional Regulation: The Lessons of Large-Scale Proteomic, Modifomic and  
547 Genomic Studies. *Molecules* **26** (2021).
- 548 30. Yan, Y. *et al.* BCFA suppresses LPS induced IL-8 mRNA expression in human  
549 intestinal epithelial cells. *Prostaglandins Leukot Essent Fatty Acids* **116**, 27-31 (2017).
- 550 31. Ran-Ressler, R.R. *et al.* Branched chain fatty acids reduce the incidence of necrotizing  
551 enterocolitis and alter gastrointestinal microbial ecology in a neonatal rat model. *PLoS*  
552 *One* **6**, e29032 (2011).
- 553 32. Hearps, A.C. *et al.* Vaginal lactic acid elicits an anti-inflammatory response from  
554 human cervicovaginal epithelial cells and inhibits production of pro-inflammatory  
555 mediators associated with HIV acquisition. *Mucosal Immunol* **10**, 1480-1490 (2017).
- 556 33. Delgado-Diaz, D.J. *et al.* Distinct Immune Responses Elicited From Cervicovaginal  
557 Epithelial Cells by Lactic Acid and Short Chain Fatty Acids Associated With Optimal  
558 and Non-optimal Vaginal Microbiota. *Front Cell Infect Microbiol* **9**, 446 (2019).

- 559 34. Nugent, S.G., Kumar, D., Rampton, D.S. & Evans, D.F. Intestinal luminal pH in  
560 inflammatory bowel disease: possible determinants and implications for therapy with  
561 aminosalicylates and other drugs. *Gut* **48**, 571-577 (2001).
- 562 35. Mustfa, S.A. *et al.* SUMOylation pathway alteration coupled with downregulation of  
563 SUMO E2 enzyme at mucosal epithelium modulates inflammation in inflammatory  
564 bowel disease. *Open Biol* **7** (2017).
- 565 36. Yavvari, P.S. *et al.* A nanogel based oral gene delivery system targeting SUMOylation  
566 machinery to combat gut inflammation. *Nanoscale* **11**, 4970-4986 (2019).
- 567
- 568



569 **Figure Legends**

570

571 **Figure 1 : Gut microbiota depletion decreases protein SUMOylation in the caecum.**

572 A, Immunoblot analysis of SUMO2/3-conjugated proteins and GAPDH levels in the caecum  
573 and jejunum of mice treated or not with antibiotics (ATB) (4 representative mice are shown  
574 for each group). B, Quantification of SUMO2/3-conjugated proteins. Values are expressed as  
575 fold-change versus untreated mice (mean  $\pm$  s.d.;  $n=5-9$ ; \*\*\*,  $P<0.001$ ; NS, not significant;  
576 two-tailed Student's t-test).

577

578 **Figure 2 : BCFAs trigger hyperSUMOylation of intestinal proteins *in vitro*.**

579 Immunoblot analysis of SUMO2/3-conjugated proteins and actin levels in CACO2 (left) and  
580 T84 (right) cells incubated with isobutyric acid (IB<sup>ic</sup>) or isovaleric acid (IV<sup>ic</sup>) for 1 or 5 h.

581

582 **Figure 3 : BCFAs and SCFAs trigger hyperSUMOylation of intestinal proteins in a pH-  
583 dependent manner.**

584 A, Immunoblot analysis of SUMO2/3-conjugated proteins and actin levels in CACO2 cells  
585 incubated with various concentrations of isovaleric acid (IV<sup>ic</sup>) or sodium isovalerate (IV<sup>ate</sup>) at  
586 definite pH. The pH and the corresponding effective concentrations of isovaleric acid (IV<sup>ic</sup><sub>eff</sub>)  
587 is indicated for each condition. B, Immunoblot analysis of SUMO2/3-conjugated proteins and  
588 actin levels in CACO2 cells incubated for 5 h with 5 mM acetic acid (Ac<sup>ic</sup>), sodium acetate  
589 (Ac<sup>ate</sup>), butyric acid (But<sup>ic</sup>), sodium butyrate (But<sup>ate</sup>), propionic acid (Prop<sup>ic</sup>) or sodium  
590 propionate (Prop<sup>ate</sup>).

591

592

593 **Figure 4 : BCFAs and SCFAs induce hyperSUMOylation in intestinal cells via ROS**  
594 **production.**

595 A, Quantification of luminol activity in CACO2 (top) or HeLa cells (bottom) treated with  
596 isobutyric acid (IB<sup>ic</sup>), sodium isobutyrate (IB<sup>ate</sup>), isovaleric acid (IV<sup>ic</sup>), sodium isovalerate  
597 (IV<sup>ate</sup>), butyric acid (But<sup>ic</sup>) or sodium butyrate (But<sup>ate</sup>) for 1 or 5 h. Values are expressed as  
598 fold-change of untreated cells (mean  $\pm$  s.d.;  $n=3$ ; \*,  $P<0.05$ ; \*\*,  $P<0.01$ ; \*\*\*,  $P<0.001$  versus  
599 untreated; One-way ANOVA, with Dunnett's correction). B, Immunoblot analysis of  
600 SUMO2/3-conjugated proteins and actin levels in CACO2 cells pre-incubated or not for 30  
601 min with 5 mM N-acetyl-cysteine (NAC) or 10  $\mu$ M Diphenyleneiodonium (DPI) and then  
602 incubated for 1 h with isobutyric acid (IB<sup>ic</sup>) or isovaleric acid (IV<sup>ic</sup>).

603

604 **Figure 5 : BCFAs inhibit intestinal cell deSUMOylases.**

605 DeSUMOylase activities, expressed as percentage of untreated cells, in CACO2 (top) or T84  
606 (bottom) cells, treated or not with isobutyric acid (IB<sup>ic</sup>) or isovaleric acid (IV<sup>ic</sup>), for 1h (left)  
607 or 5h (right) (mean  $\pm$  s.e.m.;  $n=4-5$ ; \*,  $P<0.05$ ; \*\*,  $P<0.01$ ; \*\*\*,  $P<0.001$  versus CTRL; One-  
608 way ANOVA, with Dunnett's correction).

609

610 **Figure 6 : BCFAs and SCFAs trigger hyperSUMOylation of chromatin-bound proteins.**

611 Immunoblot analysis of SUMO2/3-conjugated proteins and Lamin B1 levels in cytosolic,  
612 nuclear soluble and chromatin-bound fractions of CACO2 cells incubated for 5h with  
613 isobutyric acid (IB<sup>ic</sup>), isovaleric acid (IV<sup>ic</sup>) or butyric acid (But<sup>ic</sup>).

614

615 **Figure 7 : BCFAs and SCFA dampen responses to TNF $\alpha$  in intestinal cells.**

616 A, Quantification of IL8 and CCL20 mRNA levels in CACO2 cells pre-treated or not for 1  
617 hour with BCFAs or SCFAs and then incubated for 1 hour with 100 ng/mL TNF $\alpha$ . Values are

618 expressed as fold change versus untreated cells (mean  $\pm$  s.d.;  $n=3-4$ ; \*,  $P<0.05$ ; \*\*,  $P<0.01$ ;  
619 \*\*\*,  $P<0.001$  vs TNF $\alpha$  alone; One-way ANOVA, with Dunnett's correction). B, Immunoblot  
620 analysis of I $\kappa$ B $\alpha$  and actin levels in CACO2 cells pre-treated or not for 1 hour with 5 mM  
621 BCFAs or SCFAs and then stimulated for 30 min with 100 ng/mL TNF $\alpha$ . C, Quantification  
622 of I $\kappa$ B $\alpha$  levels, expressed as percentage compared to untreated cells (mean  $\pm$  s.d.;  $n=3$ ; \*,  
623  $P<0.05$ ; \*\*,  $P<0.01$  vs TNF $\alpha$  alone; One-way ANOVA, with Dunnett's correction) (IB<sup>ic</sup>,  
624 isobutyric acid; IB<sup>ate</sup>, sodium isobutyrate; IV<sup>ic</sup>, isovaleric acid; IV<sup>ate</sup>, sodium isovalerate;  
625 But<sup>ic</sup>, butyric acid; But<sup>ate</sup>, sodium butyrate). D, TEER in CACO2 cells grown in Transwell,  
626 pre-treated or not for 1 hour with BCFAs and then incubated for 24 hours with 100 ng/mL  
627 TNF $\alpha$ . Values are expressed as TEER percent variations compared to cells before treatment  
628 with BCFAs (mean  $\pm$  s.e.m.;  $n=4$ ; \*\*,  $P<0.01$ ; NS, not significant; two-tailed Student's t-test).

629

### 630 **Supplementary Figures**

631

632 **Figure S1 : 2-methyl-butyric acid triggers hyperSUMOylation of intestinal proteins *in***  
633 ***vitro*.**

634 Immunoblot analysis of SUMO2/3-conjugated proteins and actin levels in CACO2 (left) and  
635 T84 (right) cells incubated with 2-methyl-butyric acid (2mBut<sup>ic</sup>) for 1 or 5 h.

636

637 **Figure S2 : BCFAs do not alter the expression levels of E1 and E2 SUMO enzymes.**

638 Immunoblot analysis of UBC9, SAE1, SAE2 and actin levels in CACO2 cells incubated for 1  
639 or 5 h with 1 or 5 mM isobutyric acid (IB<sup>ic</sup>) or isovaleric acid (IV<sup>ic</sup>).

640

641

642 **Figure S3 : BCFAs do not affect Cullin-1 neddylation nor RanGAP1 SUMOylation in**

643 **CACO2 cells.**

644 A, Immunoblot analysis of Cullin-1 and actin levels in CACO2 and HeLa cells incubated with  
645 5 mM BCFAs or SCFAs. B, Quantification of the percentage of neddylated Cullin-1 (mean  $\pm$   
646 s.d.;  $n=3$ ; NS, not significant; \*\*,  $P<0.01$  vs CTRL; One-way ANOVA, with Dunnett's  
647 correction). C, Immunoblot analysis of RanGAP1 and actin levels in CACO2 cells incubated  
648 with 1 or 5 mM BCFAs. D, Quantification of the percentage of SUMOylated RanGAP1  
649 (mean  $\pm$  s.d.;  $n=3$ ; NS, not significant; One-way ANOVA, with Dunnett's correction) (IB<sup>ic</sup>,  
650 isobutyric acid; IV<sup>ic</sup>, isovaleric acid; But<sup>ic</sup>, butyric acid).

651

652 **Table S1 : Primary and secondary antibody information.**

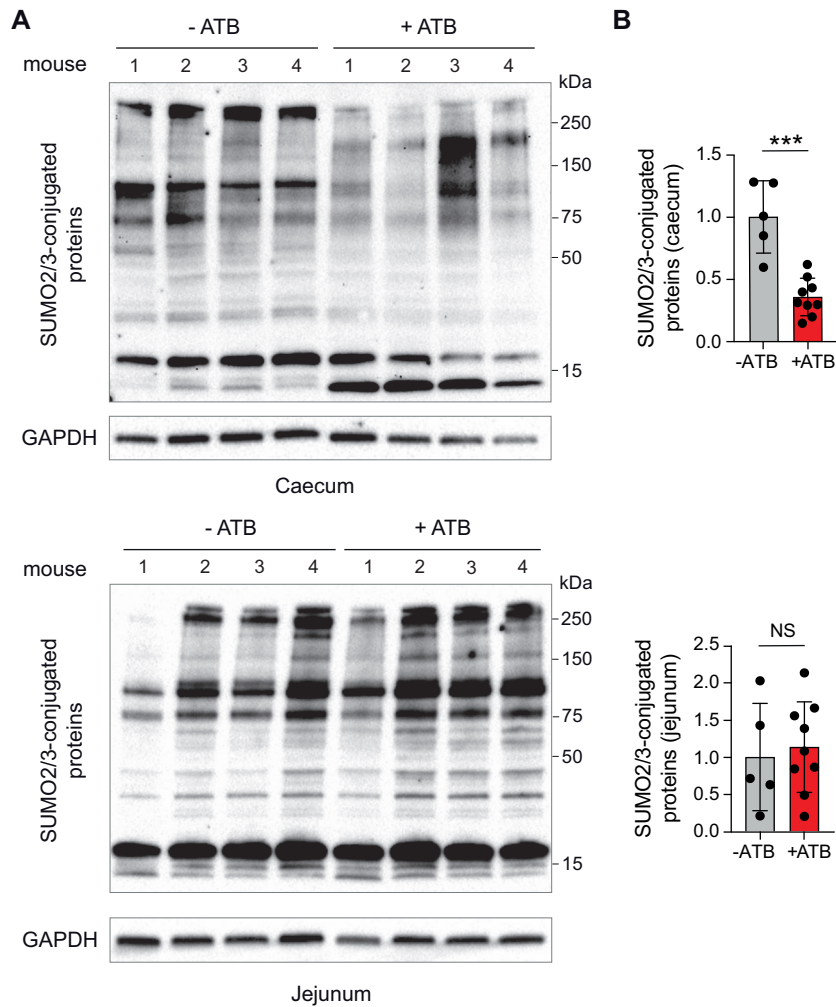

**Figure 1 : Gut microbiota depletion decreases protein SUMOylation in the caecum**

A, Immunoblot analysis of SUMO2/3-conjugated proteins and GAPDH levels in the caecum and jejunum of mice treated or not with antibiotics (ATB) (4 representative mice are shown for each group). B, Quantification of SUMO2/3-conjugated proteins. Values are expressed as fold-change versus untreated mice (mean  $\pm$  s.d.;  $n=5-9$ ; \*\*\*,  $P<0.001$ ; NS, not significant; two-tailed Student's t-test).

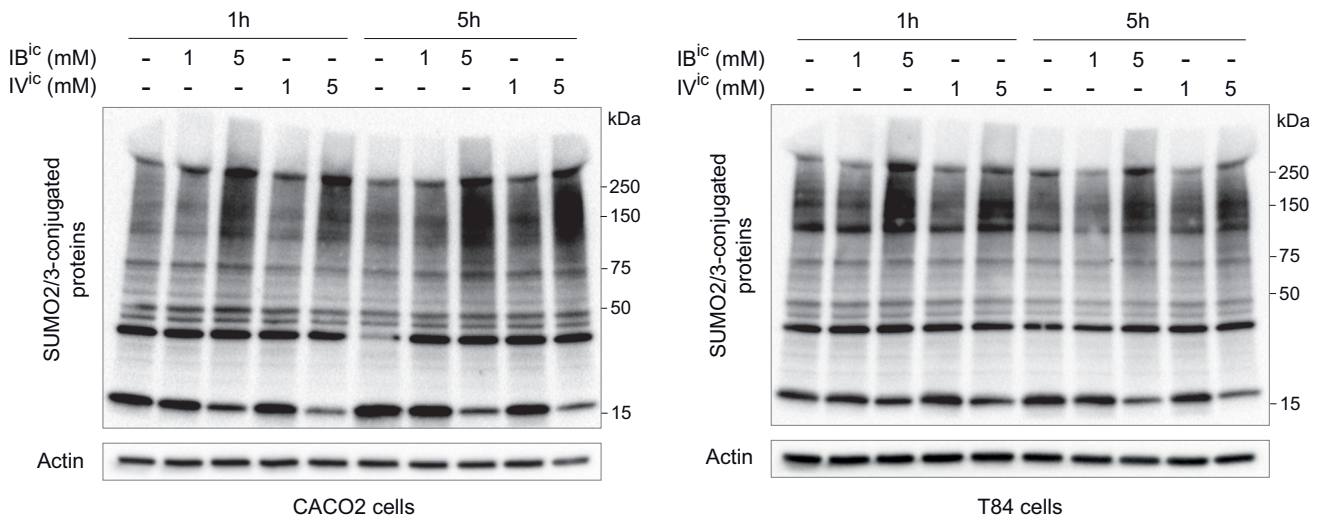

**Figure 2 : BCFAs trigger hyperSUMOylation of intestinal proteins *in vitro***

Immunoblot analysis of SUMO2/3-conjugated proteins and actin levels in CACO2 (left) and T84 (right) cells incubated with isobutyric acid (IB<sup>ic</sup>) or isovaleric acid (IV<sup>ic</sup>) for 1 or 5 h.

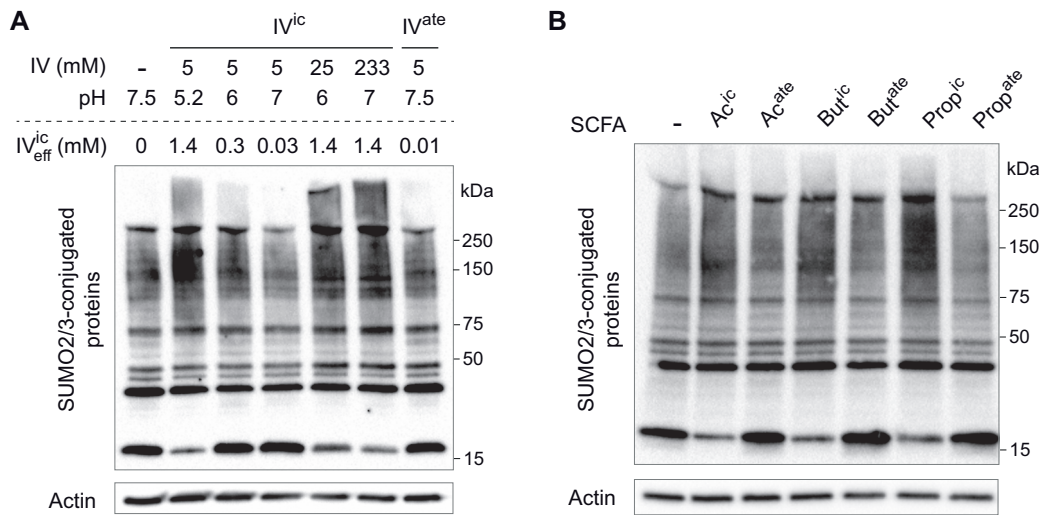

**Figure 3 : BCFAs and SCFAs trigger hyperSUMOylation of intestinal proteins in a pH-dependent manner**

A, Immunoblot analysis of SUMO2/3-conjugated proteins and actin levels in CACO2 cells incubated with various concentrations of isovaleric acid (IV<sup>ic</sup>) or sodium isovalerate (IV<sup>ate</sup>) at definite pH. The pH and the corresponding effective concentrations of isovaleric acid (IV<sup>ic</sup><sub>eff</sub>) is indicated for each condition. B, Immunoblot analysis of SUMO2/3-conjugated proteins and actin levels in CACO2 cells incubated for 5 h with 5 mM acetic acid (Ac<sup>ic</sup>), sodium acetate (Ac<sup>ate</sup>), butyric acid (But<sup>ic</sup>), sodium butyrate (But<sup>ate</sup>), propionic acid (Prop<sup>ic</sup>) or sodium propionate (Prop<sup>ate</sup>).

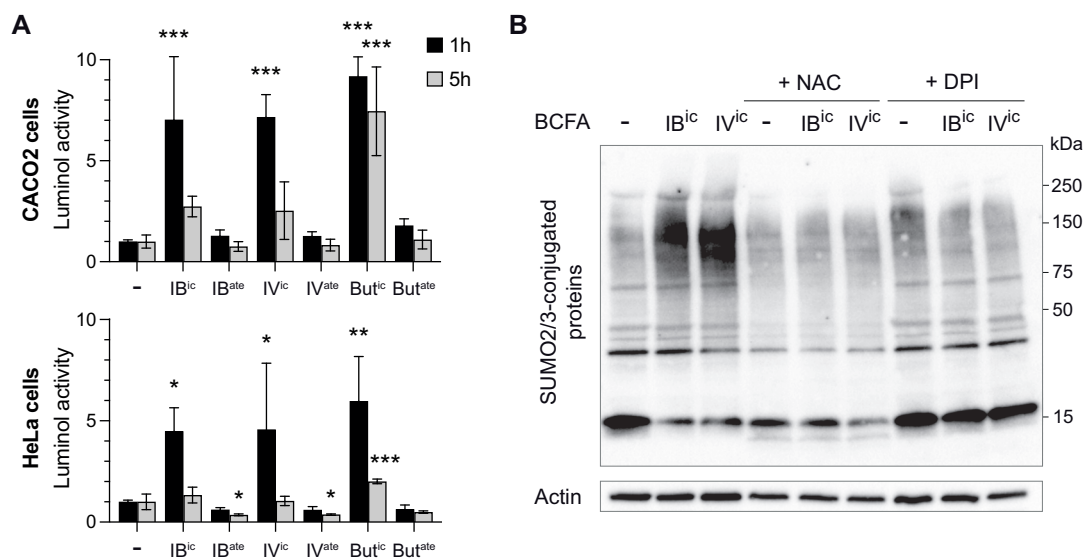

**Figure 4 : BCFAs and SCFAs induce hyperSUMOylation in intestinal cells via ROS production**

A, Quantification of luminol activity in CACO2 (top) or HeLa cells (bottom) treated with isobutyric acid (IB<sup>ic</sup>), sodium isobutyrate (IB<sup>ate</sup>), isovaleric acid (IV<sup>ic</sup>), sodium isovalerate (IV<sup>ate</sup>), butyric acid (But<sup>ic</sup>) or sodium butyrate (But<sup>ate</sup>) for 1 or 5 h. Values are expressed as fold-change of untreated cells (mean  $\pm$  s.d.;  $n=3$ ; \*,  $P<0.05$ ; \*\*,  $P<0.01$ ; \*\*\*,  $P<0.001$  versus untreated; One-way ANOVA, with Dunnett's correction). B, Immunoblot analysis of SUMO2/3-conjugated proteins and actin levels in CACO2 cells pre-incubated or not for 30 min with 5 mM N-acetyl-cysteine (NAC) or 10  $\mu$ M Diphenyleneiodonium (DPI) and then incubated for 1 h with isobutyric acid (IB<sup>ic</sup>) or isovaleric acid (IV<sup>ic</sup>).



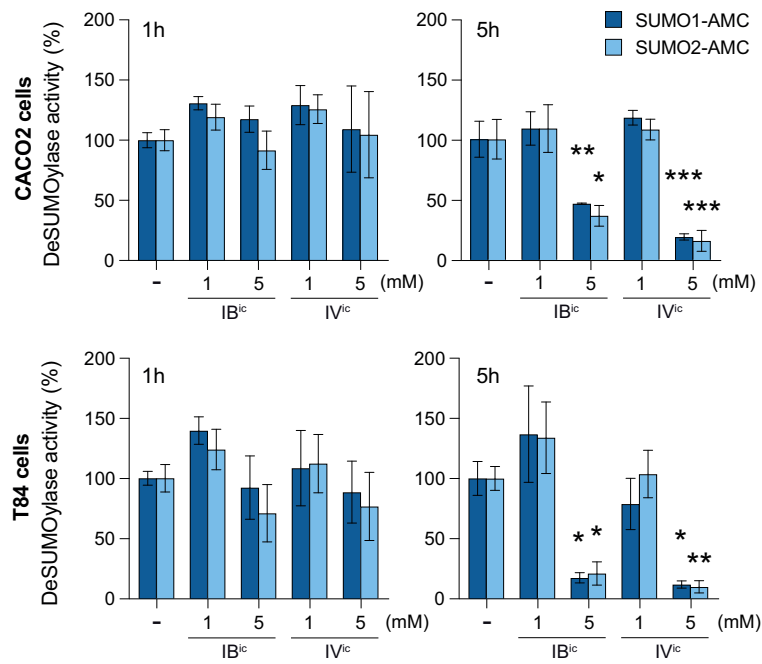

**Figure 5 : BCFA's inhibit intestinal cell deSUMOylases**

DeSUMOylase activities, expressed as percentage of untreated cells, in CACO2 (top) or T84 (bottom) cells, treated or not with isobutyric acid (IB<sup>iC</sup>) or isovaleric acid (IV<sup>iC</sup>), for 1h (left) or 5h (right) (mean  $\pm$  s.e.m.;  $n=4-5$ ; \*,  $P<0.05$ ; \*\*,  $P<0.01$ ; \*\*\*,  $P<0.001$  versus CTRL; One-way ANOVA, with Dunnett's correction).

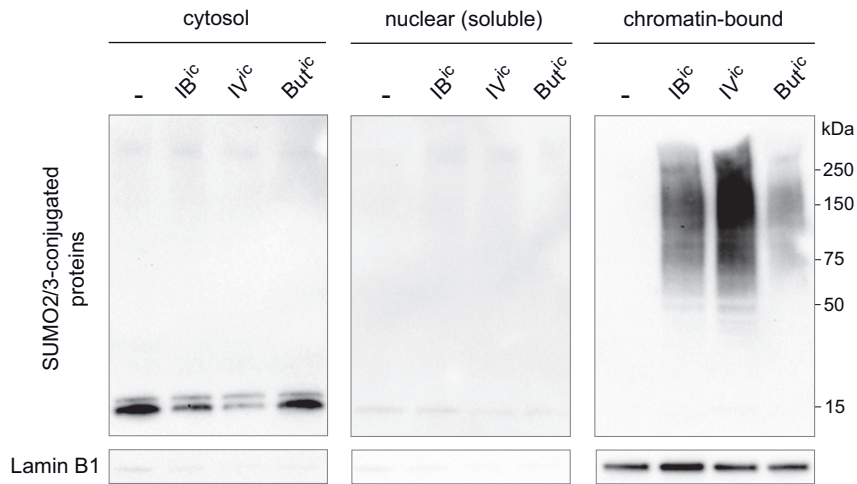

**Figure 6 : BCFAs and SCFAs trigger hyperSUMOylation of chromatin-bound proteins**

Immunoblot analysis of SUMO2/3-conjugated proteins and Lamin B1 levels in cytosolic, nuclear soluble and chromatin-bound fractions of CACO2 cells incubated for 5h with isobutyric acid (IB<sup>ic</sup>), isovaleric acid (IV<sup>ic</sup>) or butyric acid (But<sup>ic</sup>).

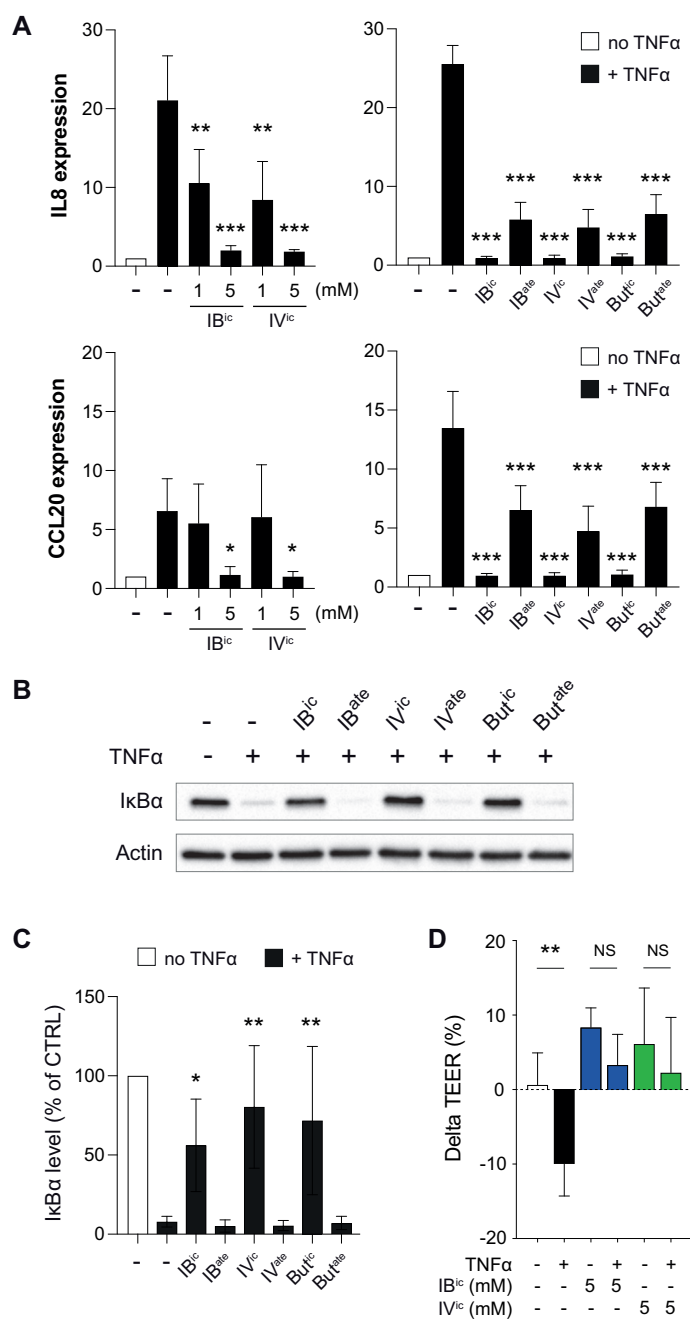

**Figure 7 : BCFAs and SCFAs dampen responses to TNF $\alpha$  in intestinal cells**

A, Quantification of IL8 and CCL20 mRNA levels in CACO2 cells pre-treated or not for 1h with BCFAs or SCFAs and then incubated for 1h with 100 ng/mL TNF $\alpha$ . Values are expressed as fold change versus untreated cells (mean  $\pm$  s.d.;  $n=3-4$ ; \*,  $P<0.05$ ; \*\*,  $P<0.01$ ; \*\*\*,  $P<0.001$  vs TNF $\alpha$  alone; One-way ANOVA, with Dunnett's correction). B, Immunoblot analysis of I $\kappa$ B $\alpha$  and actin levels in CACO2 cells pre-treated or not for 1h with 5 mM BCFAs or SCFAs and then stimulated for 30 min with 100 ng/mL TNF $\alpha$ . C, Quantification of I $\kappa$ B $\alpha$  levels, expressed as percentage compared to untreated cells (mean  $\pm$  s.d.;  $n=3$ ; \*,  $P<0.05$ ; \*\*,  $P<0.01$  vs TNF $\alpha$  alone; One-way ANOVA, with Dunnett's correction) (IB<sup>ic</sup>, isobutyric acid; IB<sup>ate</sup>, sodium isobutyrate; IV<sup>ic</sup>, isovaleric acid; IV<sup>ate</sup>, sodium isovalerate; But<sup>ic</sup>, butyric acid; But<sup>ate</sup>, sodium butyrate). D, TEER in CACO2 cells grown in Transwell, pre-treated or not for 1 hour with BCFAs and then incubated for 24 hours with 100 ng/mL TNF $\alpha$ . Values are expressed as TEER percent variations compared to cells before treatment with BCFAs (mean  $\pm$  s.e.m.;  $n=4$ ; \*\*,  $P<0.01$ ; NS, not significant; two-tailed Student's t-test).
